# Supplementary material
Source: PubMed Central journal article supplement (PMC4204746)
Supplement: IJHPM-3-269-s001.pdf [file IJHPM-3-269-s001.pdf]

## Appendix 1. Description of variables and indicators

| Variable (Concept)                  | Hyp | Indicator                             | Definition                                    | Source of Data                                                                                                                                                                                       | Years available                                                                                                   | N                                        | Operationalization                                         |                                                                            |
|-------------------------------------|-----|---------------------------------------|-----------------------------------------------|------------------------------------------------------------------------------------------------------------------------------------------------------------------------------------------------------|-------------------------------------------------------------------------------------------------------------------|------------------------------------------|------------------------------------------------------------|----------------------------------------------------------------------------|
| Dependent (Diffusion)               |     | Policy adoption                       | MHPol_A                                       | Year of mental health policy adoption                                                                                                                                                                | WHO's Mental Health Atlas, cross-checked with WHO-AIMS and WHO MiNDbank                                           | 2001, 2005, 2011; adoption year recalled | 184 (2011); 193 (2005); 185 (2001)                         | Nominal (Y/N on adoption), ordinal (5 phases of adoption), interval (year) |
| Independent (Coercion)              | 1   | International organization membership | WHO_entry                                     | Year country became a WHO member                                                                                                                                                                     | Koc University's International overnmental Organization Data (v2.3)                                               | 1964-2005                                | 214                                                        | Interval (year)                                                            |
|                                     | 2   | Official Development Assistance       | ODA                                           | ODA disbursement and commitment to recipient countries - %GNI; total net (current prices USD million)                                                                                                | OECD's International Development Statistics online database                                                       | 1960-2011 (disb) 1966-2011 (comm)        | 159 (recipients) and 45 (donors)                           | Ratio (% or \$)                                                            |
|                                     | 2   | Development Assistance for Health     | DAH                                           | Commitments and disbursements to donor or recipient countries (Million, constant 2009 US\$)                                                                                                          | WHO's Global Health Observatory Data Repository                                                                   | 2000-2010                                | 119 (recipients) and 25 (donors)                           | Ratio (\$)                                                                 |
| Independent (Emulation - proximity) | 3   | Proximity to earlier adopters         | UN_cumfreqper; WHO_cumfreqper; Geo_cumfreqper | Regional contagion effects from UN, WHO, or geographic regional reference group                                                                                                                      | WHO's Mental Health Atlas                                                                                         | 2001, 2005, 2011; adoption year recalled | 184 (2011); 193 (2005); 185 (2001)                         | Ratio (cumulative freq %)                                                  |
| Control (Emulation - similarity)    | P   | Environmental conditions              | SFI                                           | State Fragility Index, which ranges from 0 "no fragility" to 25 "extreme fragility."                                                                                                                 | Integrated Network for Societal Conflict Research's State Fragility Index and Matrix 2012                         | 1995-2012                                | 167 countries with populations greater than 500,000 people | Ordinal (scale)                                                            |
|                                     |     |                                       | DISASTER                                      | Number of natural and technological disasters                                                                                                                                                        | Centre for Research on the Epidemiology of Disasters' EM-DAT The International Disaster Database                  | 1995-2013                                | 213                                                        | Interval (# disasters)                                                     |
|                                     |     |                                       | WAR, EVENT                                    | Any involvement in intra-, inter- or extra-state wars                                                                                                                                                | Correlates of War Project's The New COW War Data (v4.0)                                                           | 1816-2007                                | 243                                                        | Nominal (Y/N instance of war)                                              |
|                                     |     | Political conditions                  | GLOBAL                                        | KOF Index of Globalization, which ranges from 1 "no globalization" to 100 "most globalization"                                                                                                       | Swiss Federal Institute of Technology Zurich's KOF Index of Globalization                                         | 1970-2010                                | 207                                                        | Ordinal (scale)                                                            |
|                                     |     |                                       | INDEP                                         | Independence is disaggregated into formation, colonization, secession, and partition.                                                                                                                | Paul Hensel's (University of Texas) Issue Correlates Of War Colonial History Data Set (v0.4)                      | 301-2002                                 | 222                                                        | Nominal (Y/N historically)                                                 |
|                                     |     |                                       | POLITY                                        | Regime type, or a polity score that ranges from -10 "hereditary monarchy" to +10 "consolidated democracy"                                                                                            | Ted Robert Gurr (University of Maryland) and Monty Marshall's (Societal-Systems Research, Inc.) Polity IV Project | 1800-2012                                | 167                                                        | Ordinal (scale)                                                            |
|                                     |     | Social conditions                     | GOVEFF                                        | Government Effectiveness, which ranges from -2.5 "low" to 2.5 "high"                                                                                                                                 | World Bank's Governance Matters Project                                                                           | 1996-2011                                | 215                                                        | Ordinal (scale)                                                            |
|                                     |     |                                       | ELF: ETHNIC, LANGUAGE, RELIGION               | Fractionalization is the probability (0-1) that two randomly drawn individuals come from the same population. It is a cumulative index of ethnic, language, and religion heterogeneity in countries. | Alberto Alesina <i>et al.</i> , 2003                                                                              | Cross-section, varies but mostly 2001    |                                                            | Ratio (probability)                                                        |
|                                     |     |                                       | PHYSINT: POLPRIS                              | Physical Integrity Right Index ranges from 0 "(no government respect for these four rights)" to 8 "full government respect for these four rights"                                                    | Cingranelli-Richards (CIRI) Human Rights Dataset                                                                  | 1981-2011                                | 200                                                        | Ordinal (scale)                                                            |

|                     |                |                                                                                                                                                                     |                                                                                  |                                                                          |                            |                           |
|---------------------|----------------|---------------------------------------------------------------------------------------------------------------------------------------------------------------------|----------------------------------------------------------------------------------|--------------------------------------------------------------------------|----------------------------|---------------------------|
| Economic conditions | INCOME         | Income groups (low, lower-middle, upper-middle, high) based on GNI per capita, Atlas method (current US\$)                                                          | World Bank's World Development Indicators                                        | 1989-2012                                                                | 252                        | Ordinal (4 income groups) |
|                     | Health_GDP     | Total expenditure on health as % of GDP                                                                                                                             | WHO National Health Account database and World Bank World Development Indicators | 1995-2011                                                                | 194                        | Ratio (%)                 |
| Population status   | DALY_MNS       | Disability-Adjusted Life Years (DALY) rates per 100,000 individuals for mental, behavioral and substance use disorders                                              | Institute for Health Metrics and Evaluation's Global Burden of Disease Study     | 1990 (countries); 2000 (region only), 2004 (countries), 2010 (countries) | 193 (2010), 187 (2004)     | Ratio (prevalence rate)   |
|                     | MIGPOP: REFPOP | International migrant stock as a percentage of the total population (both sexes) and separately refugees as a percentage of the total population (both sexes).      | United Nation's Global Migration Database                                        | 1990, 2000, 2010, 2013                                                   | 232                        | Ratio (%)                 |
|                     | MDG            | Millennium Development Goal Progress Index, which ranges from 0 (low achievement) to 7 (high achievement). The Index is an additive score of the eight MDG targets. | Center for Global Development                                                    | 2010-2013                                                                | 134 (developing countries) | Ordinal (scale)           |
|                     | HDI            | Human Development Index, which ranges from 0 "low" to 1 "high"                                                                                                      | United Nations Development Programme                                             | 1960-2012                                                                | 194                        | Ordinal (scale)           |
